# Supplementary material for: Effects of Exercise on Insulin, IGF Axis, Adipocytokines, and Inflammatory Markers in Breast Cancer Survivors: A Systematic Review and Meta-analysis
Source: Oxford University Press journal article supplement (doi:10.1158/1055-9965.epi-16-0602), 2016-10-14
Supplement: 10559965epi160602-sup-168791_1_supp_3680188_ppfq4w.docx [file 10559965epi160602-sup-168791_1_supp_3680188_ppfq4w.docx]

**Supplementary Table**. The effects of exercise on insulin according to weight reduction in breast cancer survivors

| Subgroup | | No. of Studies | N | I2 | WMD [95% CI] | *P*-value |
| --- | --- | --- | --- | --- | --- | --- |
| Weight Reduction | |  |  |  |  |  |
|  | Yes* | 4  [25, 27, 29] | 116 | 82% | -7.10 [-10.31, -3.90] | <.001 |
|  | No | 3  [23, 24, 28, 32] | 253 | 81% | -0.78 [-2.32, 0.77] | 0.32 |

* included studies that showed weight reduction in an exercise intervention group. I2 indicates heterogeneity. Both analyses used a random-effects model. WMD = weighted mean difference, CI = confidence interval
